# Supplementary material
Source: Springer Nature journal article supplement (https://www.springermedizin.de/resource/supplementary/12943_2009_666_MOESM12_ESM.pdf/9554522)

HOXA10

fold expression

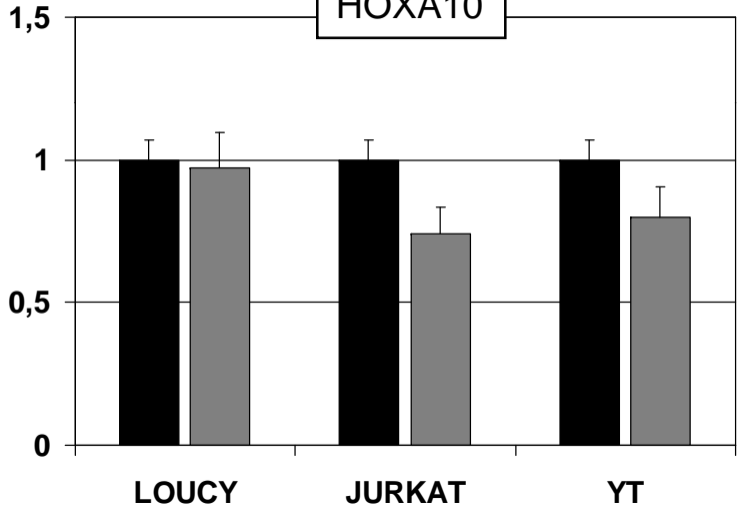

■ DMSO control  
■ rapamycin

Supplement: MOESM12 [file 9554522]
